# Supplementary material for: Design of an anti-inflammatory diet (ITIS diet) for patients with rheumatoid arthritis
Source: PubMed Central journal article supplement — Contemp Clin Trials Commun. 2020 Jan 21;17:100524. doi: 10.1016/j.conctc.2020.100524 (PMC6997513; doi:10.1016/j.conctc.2020.100524), 2020-01-21
Supplement: mmc1.pdf [file mmc1.pdf]

Additional file 1. Diet habit questionnaire

| TYPE OF FOOD AND QUANTITY                            | AVERAGE FREQUENCY DURING THE PAST YEAR |                   |               |                  |                  |            |                   |                 |                |
|------------------------------------------------------|----------------------------------------|-------------------|---------------|------------------|------------------|------------|-------------------|-----------------|----------------|
| MEAT AND FISH                                        | Never or less than once a month        | 1-3 times a month | 1 time a week | 2-4 times a week | 5-6 times a week | Once a day | 2-3 times per day | 4-5 times a day | +6 times a day |
| Beef: steak, entrecote, ribs, etc.                   |                                        |                   |               |                  |                  |            |                   |                 |                |
| Beef: hamburger                                      |                                        |                   |               |                  |                  |            |                   |                 |                |
| Pork: loin, ribs, carnitas                           |                                        |                   |               |                  |                  |            |                   |                 |                |
| Bacon                                                |                                        |                   |               |                  |                  |            |                   |                 |                |
| Lunch meat                                           |                                        |                   |               |                  |                  |            |                   |                 |                |
| Chicken or turkey                                    |                                        |                   |               |                  |                  |            |                   |                 |                |
| Sausages                                             |                                        |                   |               |                  |                  |            |                   |                 |                |
| Liver, pate, etc.                                    |                                        |                   |               |                  |                  |            |                   |                 |                |
| Fried fish                                           |                                        |                   |               |                  |                  |            |                   |                 |                |
| Grilled White fish: Mahi Mahi, cod, hake, etc.       |                                        |                   |               |                  |                  |            |                   |                 |                |
| Grilled blue fish: tuna, sardines, salmon, anchovies |                                        |                   |               |                  |                  |            |                   |                 |                |
| Seafood: clams, prawns, crab, mussels, etc.          |                                        |                   |               |                  |                  |            |                   |                 |                |
|                                                      | Never or less than once a month        | 1-3 times a month | 1 time a week | 2-4 times a week | 5-6 times a week | Once a day | 2-3 times per day | 4-5 times a day | +6 times a day |

| TYPE OF FOOD AND QUANTITY                    | AVERAGE FREQUENCY DURING THE PAST YEAR |                   |               |                  |                  |            |                 |                 |                |
|----------------------------------------------|----------------------------------------|-------------------|---------------|------------------|------------------|------------|-----------------|-----------------|----------------|
| BREAD AND CEREALS                            | Never or less than once a month        | 1-3 times a month | 1 time a week | 2-4 times a week | 5-6 times a week | Once a day | 2-3 times a day | 4-5 times a day | +6 times a day |
| White bread and wheat tortillas              |                                        |                   |               |                  |                  |            |                 |                 |                |
| Whole wheat bread and whole wheat tortillas  |                                        |                   |               |                  |                  |            |                 |                 |                |
| Bagels                                       |                                        |                   |               |                  |                  |            |                 |                 |                |
| Crackers, pretzels                           |                                        |                   |               |                  |                  |            |                 |                 |                |
| Pizza                                        |                                        |                   |               |                  |                  |            |                 |                 |                |
| Corn tortilla                                |                                        |                   |               |                  |                  |            |                 |                 |                |
| Other types of bread (rye, spelt)            |                                        |                   |               |                  |                  |            |                 |                 |                |
| Breakfast cereals: cornflakes, granola, etc. |                                        |                   |               |                  |                  |            |                 |                 |                |
| Oatmeal                                      |                                        |                   |               |                  |                  |            |                 |                 |                |
| White rice                                   |                                        |                   |               |                  |                  |            |                 |                 |                |
| Brown rice                                   |                                        |                   |               |                  |                  |            |                 |                 |                |
| Pasta                                        |                                        |                   |               |                  |                  |            |                 |                 |                |
| Whole wheat pasta                            |                                        |                   |               |                  |                  |            |                 |                 |                |
| Quinoa, millet                               |                                        |                   |               |                  |                  |            |                 |                 |                |
| Couscous                                     |                                        |                   |               |                  |                  |            |                 |                 |                |
|                                              | Never or less than once a month        | 1-3 times a month | 1 time a week | 2-4 times a week | 5-6 times a week | Once a day | 2-3 times a day | 4-5 times a day | +6 times a day |

| TYPE OF FOOD AND QUANTITY                        | AVERAGE FREQUENCY DURING THE PAST YEAR |                   |               |                  |                  |            |                 |                 |                |
|--------------------------------------------------|----------------------------------------|-------------------|---------------|------------------|------------------|------------|-----------------|-----------------|----------------|
| VEGETABLES AND MUSHROOMS                         | Never or less than once a month        | 1-3 times a month | 1 time a week | 2-4 times a week | 5-6 times a week | Once a day | 2-3 times a day | 4-5 times a day | +6 times a day |
| Potatoes                                         |                                        |                   |               |                  |                  |            |                 |                 |                |
| Lettuce, arugula                                 |                                        |                   |               |                  |                  |            |                 |                 |                |
| Spinach                                          |                                        |                   |               |                  |                  |            |                 |                 |                |
| Celery, fennel                                   |                                        |                   |               |                  |                  |            |                 |                 |                |
| Carrot                                           |                                        |                   |               |                  |                  |            |                 |                 |                |
| Sweet potato, turnip                             |                                        |                   |               |                  |                  |            |                 |                 |                |
| Tomato                                           |                                        |                   |               |                  |                  |            |                 |                 |                |
| Onion, garlic                                    |                                        |                   |               |                  |                  |            |                 |                 |                |
| Leeks, asparagus                                 |                                        |                   |               |                  |                  |            |                 |                 |                |
| Mushroom                                         |                                        |                   |               |                  |                  |            |                 |                 |                |
| Seaweed                                          |                                        |                   |               |                  |                  |            |                 |                 |                |
| Zucchini, pumpkin,                               |                                        |                   |               |                  |                  |            |                 |                 |                |
| Green, red, yellow, orange pepper                |                                        |                   |               |                  |                  |            |                 |                 |                |
| Green beans                                      |                                        |                   |               |                  |                  |            |                 |                 |                |
| Cabbage, red cabbage, brussels sprouts, broccoli |                                        |                   |               |                  |                  |            |                 |                 |                |
| Radish, artichokes                               |                                        |                   |               |                  |                  |            |                 |                 |                |
| Eggplant                                         |                                        |                   |               |                  |                  |            |                 |                 |                |
|                                                  | Never or less than once a month        | 1-3 times a month | 1 time a week | 2-4 times a week | 5-6 times a week | Once a day | 2-3 times a day | 4-5 times a day | +6 times a day |

| TYPE OF FOOD AND QUANTITY    | AVERAGE FREQUENCY DURING THE PAST YEAR |                   |               |                  |                  |            |                 |                 |                |
|------------------------------|----------------------------------------|-------------------|---------------|------------------|------------------|------------|-----------------|-----------------|----------------|
|                              | Never or less than once a month        | 1-3 times a month | 1 time a week | 2-4 times a week | 5-6 times a week | Once a day | 2-3 times a day | 4-5 times a day | +6 times a day |
| <b>LEGUMES</b>               |                                        |                   |               |                  |                  |            |                 |                 |                |
| Green peas                   |                                        |                   |               |                  |                  |            |                 |                 |                |
| Lentils                      |                                        |                   |               |                  |                  |            |                 |                 |                |
| Garbanzo beans               |                                        |                   |               |                  |                  |            |                 |                 |                |
| White beans                  |                                        |                   |               |                  |                  |            |                 |                 |                |
| Red beans                    |                                        |                   |               |                  |                  |            |                 |                 |                |
| <b>NUTS</b>                  |                                        |                   |               |                  |                  |            |                 |                 |                |
| Almonds, hazelnuts           |                                        |                   |               |                  |                  |            |                 |                 |                |
| Walnuts                      |                                        |                   |               |                  |                  |            |                 |                 |                |
| Sunflower seeds              |                                        |                   |               |                  |                  |            |                 |                 |                |
| Sesame seeds                 |                                        |                   |               |                  |                  |            |                 |                 |                |
| hazelnuts                    |                                        |                   |               |                  |                  |            |                 |                 |                |
| Pistachios, peanuts          |                                        |                   |               |                  |                  |            |                 |                 |                |
| Chia seeds                   |                                        |                   |               |                  |                  |            |                 |                 |                |
|                              |                                        |                   |               |                  |                  |            |                 |                 |                |
| <b>SPREADS</b>               |                                        |                   |               |                  |                  |            |                 |                 |                |
| Hummus                       |                                        |                   |               |                  |                  |            |                 |                 |                |
| Tahini                       |                                        |                   |               |                  |                  |            |                 |                 |                |
| Almond butter, peanut butter |                                        |                   |               |                  |                  |            |                 |                 |                |
|                              | Never or less than once a month        | 1-3 times a month | 1 time a week | 2-4 times a week | 5-6 times a week | Once a day | 2-3 times a day | 4-5 times a day | +6 times a day |

| TYPE OF FOOD AND QUANTITY                                                                            | AVERAGE FREQUENCY DURING THE PAST YEAR |                   |               |                  |                  |            |                 |                 |                |
|------------------------------------------------------------------------------------------------------|----------------------------------------|-------------------|---------------|------------------|------------------|------------|-----------------|-----------------|----------------|
| <b>FRUITS</b> (In the case of season fruits, estimate the frequency based on the season consumption) | Never or less than once a month        | 1-3 times a month | 1 time a week | 2-4 times a week | 5-6 times a week | Once a day | 2-3 times a day | 4-5 times a day | +6 times a day |
| <b>Strawberries, blackberries, raspberries, cranberries.</b>                                         |                                        |                   |               |                  |                  |            |                 |                 |                |
| <b>Melon, watermelon, honeydew cantaloupe</b>                                                        |                                        |                   |               |                  |                  |            |                 |                 |                |
| <b>Mango, pineapple, papaya</b>                                                                      |                                        |                   |               |                  |                  |            |                 |                 |                |
| <b>Grapes</b>                                                                                        |                                        |                   |               |                  |                  |            |                 |                 |                |
| <b>Orange, tangerines</b>                                                                            |                                        |                   |               |                  |                  |            |                 |                 |                |
| <b>Apple, pear</b>                                                                                   |                                        |                   |               |                  |                  |            |                 |                 |                |
| <b>Peach, nectarine, apricot</b>                                                                     |                                        |                   |               |                  |                  |            |                 |                 |                |
| <b>Avocado</b>                                                                                       |                                        |                   |               |                  |                  |            |                 |                 |                |
| <b>Banana</b>                                                                                        |                                        |                   |               |                  |                  |            |                 |                 |                |
| <b>Lime, lemon</b>                                                                                   |                                        |                   |               |                  |                  |            |                 |                 |                |
| <b>Prunes, raisins</b>                                                                               |                                        |                   |               |                  |                  |            |                 |                 |                |
| <b>Fruit juice (home-made)</b>                                                                       |                                        |                   |               |                  |                  |            |                 |                 |                |
| <b>Fruit juice (store)</b>                                                                           |                                        |                   |               |                  |                  |            |                 |                 |                |
|                                                                                                      | Never or less than once a month        | 1-3 times a month | 1 time a week | 2-4 times a week | 5-6 times a week | Once a day | 2-3 times a day | 4-5 times a day | +6 times a day |

| TYPE OF FOOD AND QUANTITY        | AVERAGE FREQUENCY DURING THE PAST YEAR |                   |               |                  |                  |            |                 |                 |                |
|----------------------------------|----------------------------------------|-------------------|---------------|------------------|------------------|------------|-----------------|-----------------|----------------|
| SAUCES                           | Never or less than once a month        | 1-3 times a month | 1 time a week | 2-4 times a week | 5-6 times a week | Once a day | 2-3 times a day | 4-5 times a day | +6 times a day |
| Ketchup                          |                                        |                   |               |                  |                  |            |                 |                 |                |
| Tomato sauce                     |                                        |                   |               |                  |                  |            |                 |                 |                |
| Mayonnaise                       |                                        |                   |               |                  |                  |            |                 |                 |                |
| Barbeque sauce                   |                                        |                   |               |                  |                  |            |                 |                 |                |
| Cheese dip                       |                                        |                   |               |                  |                  |            |                 |                 |                |
| Other sauces                     |                                        |                   |               |                  |                  |            |                 |                 |                |
| Olive oil                        |                                        |                   |               |                  |                  |            |                 |                 |                |
| Palm oil                         |                                        |                   |               |                  |                  |            |                 |                 |                |
| Flaxseed oil                     |                                        |                   |               |                  |                  |            |                 |                 |                |
| Vegetable oil                    |                                        |                   |               |                  |                  |            |                 |                 |                |
| Sesame oil                       |                                        |                   |               |                  |                  |            |                 |                 |                |
| Coconut oil                      |                                        |                   |               |                  |                  |            |                 |                 |                |
| Canola oil                       |                                        |                   |               |                  |                  |            |                 |                 |                |
| Wine, balsamic and other vinegar |                                        |                   |               |                  |                  |            |                 |                 |                |
| Apple vinegar with the mother    |                                        |                   |               |                  |                  |            |                 |                 |                |
|                                  | Never or less than once a month        | 1-3 times a month | 1 time a week | 2-4 times a week | 5-6 times a week | Once a day | 2-3 times a day | 4-5 times a day | +6 times a day |

| TYPE OF FOOD AND QUANTITY                          | AVERAGE FREQUENCY DURING THE PAST YEAR |                   |               |                  |                  |            |                 |                 |                |
|----------------------------------------------------|----------------------------------------|-------------------|---------------|------------------|------------------|------------|-----------------|-----------------|----------------|
|                                                    | Never or less than once a month        | 1-3 times a month | 1 time a week | 2-4 times a week | 5-6 times a week | Once a day | 2-3 times a day | 4-5 times a day | +6 times a day |
| <b>SWEETS AND SNACKS</b>                           |                                        |                   |               |                  |                  |            |                 |                 |                |
| Cookies (one)                                      |                                        |                   |               |                  |                  |            |                 |                 |                |
| Cakes and pies (home-made)                         |                                        |                   |               |                  |                  |            |                 |                 |                |
| Cakes and pies (store bought)                      |                                        |                   |               |                  |                  |            |                 |                 |                |
| Bakery: croissants, donuts, muffins (home-made)    |                                        |                   |               |                  |                  |            |                 |                 |                |
| Bakery: croissants, donuts, muffins (store-bought) |                                        |                   |               |                  |                  |            |                 |                 |                |
| Pudding, pancakes                                  |                                        |                   |               |                  |                  |            |                 |                 |                |
| Chocolate, Candy bars                              |                                        |                   |               |                  |                  |            |                 |                 |                |
| Candy                                              |                                        |                   |               |                  |                  |            |                 |                 |                |
| Jam, jelly (raspberry, blackberry, apricot, etc.)  |                                        |                   |               |                  |                  |            |                 |                 |                |
| Peanut butter                                      |                                        |                   |               |                  |                  |            |                 |                 |                |
| Brown, white or cane sugar                         |                                        |                   |               |                  |                  |            |                 |                 |                |
| Potato chips                                       |                                        |                   |               |                  |                  |            |                 |                 |                |
| Corn chips                                         |                                        |                   |               |                  |                  |            |                 |                 |                |
| Tortilla chips                                     |                                        |                   |               |                  |                  |            |                 |                 |                |
|                                                    | Never or less than once a month        | 1-3 times a month | 1 time a week | 2-4 times a week | 5-6 times a week | Once a day | 2-3 times a day | 4-5 times a day | +6 times a day |

| TYPE OF FOOD AND QUANTITY                                           | AVERAGE FREQUENCY DURING THE PAST YEAR |                   |               |                  |                  |            |                 |                 |                |
|---------------------------------------------------------------------|----------------------------------------|-------------------|---------------|------------------|------------------|------------|-----------------|-----------------|----------------|
|                                                                     | Never or less than once a month        | 1-3 times a month | 1 time a week | 2-4 times a week | 5-6 times a week | Once a day | 2-3 times a day | 4-5 times a day | +6 times a day |
| <b>SOUPS</b>                                                        |                                        |                   |               |                  |                  |            |                 |                 |                |
| Miso soup                                                           |                                        |                   |               |                  |                  |            |                 |                 |                |
| Chicken soup (home-made)                                            |                                        |                   |               |                  |                  |            |                 |                 |                |
| Chicken soup (store bought)                                         |                                        |                   |               |                  |                  |            |                 |                 |                |
| Vegetable soup (home-made)                                          |                                        |                   |               |                  |                  |            |                 |                 |                |
| Vegetable soup (store)                                              |                                        |                   |               |                  |                  |            |                 |                 |                |
| <b>DRINKS</b>                                                       |                                        |                   |               |                  |                  |            |                 |                 |                |
| Coffee                                                              |                                        |                   |               |                  |                  |            |                 |                 |                |
| Green tea                                                           |                                        |                   |               |                  |                  |            |                 |                 |                |
| Black tea and others                                                |                                        |                   |               |                  |                  |            |                 |                 |                |
| Herbal infusion                                                     |                                        |                   |               |                  |                  |            |                 |                 |                |
| Sodas                                                               |                                        |                   |               |                  |                  |            |                 |                 |                |
| Wine (a glass)                                                      |                                        |                   |               |                  |                  |            |                 |                 |                |
| Beer (half pint)                                                    |                                        |                   |               |                  |                  |            |                 |                 |                |
| Other alcoholic drinks (whisky, liquor, brandy, gin) (by the glass) |                                        |                   |               |                  |                  |            |                 |                 |                |
|                                                                     | Never or less than once a month        | 1-3 times a month | 1 time a week | 2-4 times a week | 5-6 times a week | Once a day | 2-3 times a day | 4-5 times a day | +6 times a day |



| TYPE OF FOOD AND QUANTITY | AVERAGE FREQUENCY DURING THE PAST YEAR |                   |               |                  |                  |            |                 |                 |                |
|---------------------------|----------------------------------------|-------------------|---------------|------------------|------------------|------------|-----------------|-----------------|----------------|
| DAIRY PRODUCTS AND EGGS   | Never or less than once a month        | 1-3 times a month | 1 time a week | 2-4 times a week | 5-6 times a week | Once a day | 2-3 times a day | 4-5 times a day | +6 times a day |
| Cow milk (by the glass)   |                                        |                   |               |                  |                  |            |                 |                 |                |
| Cheese (a portion)        |                                        |                   |               |                  |                  |            |                 |                 |                |
| Creamy cheese             |                                        |                   |               |                  |                  |            |                 |                 |                |
| Sour cream                |                                        |                   |               |                  |                  |            |                 |                 |                |
| Yogurt, kefir             |                                        |                   |               |                  |                  |            |                 |                 |                |
| EGG (1-2)                 |                                        |                   |               |                  |                  |            |                 |                 |                |
| SPICES                    |                                        |                   |               |                  |                  |            |                 |                 |                |
| Salt (a teaspoon)         |                                        |                   |               |                  |                  |            |                 |                 |                |
| Black pepper              |                                        |                   |               |                  |                  |            |                 |                 |                |
| Paprika                   |                                        |                   |               |                  |                  |            |                 |                 |                |
| Chili, jalapenos          |                                        |                   |               |                  |                  |            |                 |                 |                |
| Turmeric, curry powder    |                                        |                   |               |                  |                  |            |                 |                 |                |
| Cinnamon                  |                                        |                   |               |                  |                  |            |                 |                 |                |
| Curcumin                  |                                        |                   |               |                  |                  |            |                 |                 |                |
| Nutmeg                    |                                        |                   |               |                  |                  |            |                 |                 |                |
| Cilantro, parsley         |                                        |                   |               |                  |                  |            |                 |                 |                |
| Clove                     |                                        |                   |               |                  |                  |            |                 |                 |                |
|                           | Never or less than once a month        | 1-3 times a month | 1 time a week | 2-4 times a week | 5-6 times a week | Once a day | 2-3 times a day | 4-5 times a day | +6 times a day |

| HABITS                      | AVERAGE FREQUENCY DURING THE PAST YEAR |                   |               |                  |                  |            |                 |                 |                |
|-----------------------------|----------------------------------------|-------------------|---------------|------------------|------------------|------------|-----------------|-----------------|----------------|
| WAYS OF COOKING             | Never or less than once a month        | 1-3 times a month | 1 time a week | 2-4 times a week | 5-6 times a week | Once a day | 2-3 times a day | 4-5 times a day | +6 times a day |
| Steam or boiling            |                                        |                   |               |                  |                  |            |                 |                 |                |
| Fried (less than 5 minutes) |                                        |                   |               |                  |                  |            |                 |                 |                |
| Fried (more than 5 minutes) |                                        |                   |               |                  |                  |            |                 |                 |                |
| Baked                       |                                        |                   |               |                  |                  |            |                 |                 |                |
| Fast food                   |                                        |                   |               |                  |                  |            |                 |                 |                |
| Frozen and canned food      |                                        |                   |               |                  |                  |            |                 |                 |                |
| Home-made food              |                                        |                   |               |                  |                  |            |                 |                 |                |
| OTHER HABITS                |                                        |                   |               |                  |                  |            |                 |                 |                |
| Light exercise              |                                        |                   |               |                  |                  |            |                 |                 |                |
| Moderate-intense exercise   |                                        |                   |               |                  |                  |            |                 |                 |                |
| Tobacco                     |                                        |                   |               |                  |                  |            |                 |                 |                |
| Marijuana                   |                                        |                   |               |                  |                  |            |                 |                 |                |
| Other drugs                 |                                        |                   |               |                  |                  |            |                 |                 |                |
|                             | Never or less than once a month        | 1-3 times a month | 1 time a week | 2-4 times a week | 5-6 times a week | Once a day | 2-3 times a day | 4-5 times a day | +6 times a day |

1. Is there any other food that you eat more than once a week?

YES   NO

If you answered YES, please specify:

| Food                 | Quantity             | Times/week           |
|----------------------|----------------------|----------------------|
| <input type="text"/> | <input type="text"/> | <input type="text"/> |
| <input type="text"/> | <input type="text"/> | <input type="text"/> |
| <input type="text"/> | <input type="text"/> | <input type="text"/> |
| <input type="text"/> | <input type="text"/> | <input type="text"/> |
| <input type="text"/> | <input type="text"/> | <input type="text"/> |

2. What type of milk do you usually drink?

Select one:

|                                      |                          |
|--------------------------------------|--------------------------|
| Whole milk (cow)                     | <input type="checkbox"/> |
| 2% milk (cow)                        | <input type="checkbox"/> |
| Reduced fat milk (cow)               | <input type="checkbox"/> |
| Milk (from other animals except cow) | <input type="checkbox"/> |
| Soymilk                              | <input type="checkbox"/> |
| Rice milk                            | <input type="checkbox"/> |
| Almond milk                          | <input type="checkbox"/> |
| Coconut milk                         | <input type="checkbox"/> |
| I do not drink any type of milk      | <input type="checkbox"/> |

3. How many meals do you have a day? At what times and which are the important ones?

**Additional file 2.** This table represents the average weekly consumption of ingredients per all patients

| PRODUCT                         | Average | Standard deviation | Median | PRODUCT                                           | Average | Standard deviation | Median |
|---------------------------------|---------|--------------------|--------|---------------------------------------------------|---------|--------------------|--------|
| <b>MEAT AND FISH</b>            |         |                    |        | <b>OILS</b>                                       |         |                    |        |
| Beef meat                       | 0.7     | 0.9                | 0.5    | Olive oil                                         | 2.5     | 2.5                | 2.0    |
| Beef hamburger                  | 0.4     | 0.4                | 0.0    | Palm oil                                          | 0.0     | 0.0                | 0.0    |
| Pork meat                       | 0.3     | 0.3                | 0.0    | Vegetable oil                                     | 0.6     | 1.0                | 0.8    |
| Bacon                           | 0.3     | 0.4                | 0.0    | Sesame oil                                        | 0.0     | 0.0                | 0.0    |
| Lunch meat                      | 1.5     | 1.4                | 0.5    | Sunflower oil                                     | 0.0     | 0.0                | 0.0    |
| Chicken or turkey               | 2.5     | 1.6                | 3.0    | Coconut oil                                       | 0.1     | 0.3                | 0.5    |
| Sausages                        | 0.9     | 1.2                | 0.5    | Canola oil                                        | 0.9     | 1.4                | 0.0    |
| Liver                           | 0.2     | 0.3                | 0.0    | Wine vinager and other vinegar                    | 0.6     | 1.0                | 0.0    |
| Fried fish                      | 0.2     | 0.2                | 0.0    | Apple vinegar with the mother                     | 0.5     | 1.0                | 0.0    |
| Grilled White fish              | 0.5     | 0.9                | 0.0    | <b>SWEETS AND SNACKS</b>                          |         |                    |        |
| Grilled oily fish               | 0.6     | 1.0                | 0.5    | Cookies (one)                                     | 2.9     | 2.7                | 3.0    |
| Seafood                         | 0.2     | 0.3                | 0.0    | Cakes and pies (home-made)                        | 0.2     | 0.3                | 0.0    |
| <b>BREAD AND CEREALS</b>        |         |                    |        | Cakes and pies (store bought)                     | 0.70    | 0.00               | 0.58   |
| White bread                     | 1.7     | 1.6                | 0.8    | Bakery (home made)                                | 0.1     | 0.3                | 0.0    |
| Whole wheat bread               | 3.9     | 3.9                | 3.0    | Bakery: croassants, donuts, muffins(store bought) | 0.8     | 1.2                | 0.0    |
| Pizza                           | 0.7     | 0.9                | 0.5    | Puddings, pancakes                                | 0.8     | 1.8                | 0.0    |
| Corn tortilla                   | 0.8     | 1.3                | 0.0    | Pies                                              | 0.8     | 1.9                | 0.0    |
| Bread based on other cereals    | 3.4     | 4.6                | 3.3    | Chocolate, Candy bars                             | 0.4     | 0.4                | 0.0    |
| Breakfast cereals               | 0.3     | 0.4                | 0.3    | Candy                                             | 0.1     | 0.2                | 0.0    |
| White rice                      | 1.9     | 1.2                | 3.0    | Jam, jelly                                        | 1.1     | 1.1                | 0.8    |
| Brown rice                      | 1.8     | 2.3                | 1.0    | Peanut butter                                     | 1.0     | 1.1                | 0.5    |
| Pasta                           | 1.2     | 1.1                | 1.0    | Added sugar                                       | 2.7     | 3.0                | 4.3    |
| Whole wheat pasta               | 0.8     | 1.3                | 0.3    | Potato chips                                      | 0.7     | 0.9                | 0.3    |
| Quinoa, millet                  | 1.1     | 1.2                | 0.5    | Corn chips                                        | 0.3     | 0.4                | 0.0    |
| Couscous                        | 0.6     | 1.0                | 0.3    | Tortilla chips                                    | 0.5     | 0.4                | 0.5    |
| <b>VEGETABLES AND MUSHROOMS</b> |         |                    |        | <b>SOUPS</b>                                      |         |                    |        |
| Potatoes                        | 1.3     | 1.3                | 1.8    | Miso soup                                         | 0.1     | 0.2                | 0.0    |
| Lettuce, arugula                | 4.1     | 4.1                | 3.0    | Chicken soup (home made)                          | 0.7     | 0.9                | 0.5    |
| Celery, fennel                  | 1.9     | 2.2                | 2.0    | Chicken soup (store bought)                       | 0.1     | 0.2                | 0.0    |
| Carrot                          | 2.3     | 2.5                | 2.0    | Vegetable soup (home made)                        | 0.9     | 1.2                | 0.5    |
| Sweet potato, turnip            | 3.1     | 2.4                | 3.0    | Vegetable soup (store bought)                     | 0.1     | 0.2                | 0.0    |
| Tomato                          | 0.4     | 1.0                | 0.0    | <b>DRINKS</b>                                     |         |                    |        |
| Onion, garlic                   | 3.4     | 2.6                | 5.5    | Coffee                                            | 7.3     | 5.7                | 7.0    |
| Leeks                           | 4.0     | 2.4                | 5.5    | Green tea                                         | 0.2     | 0.4                | 0.0    |
| Mushroom                        | 0.4     | 1.0                | 0.0    | Black tea and others                              | 1.1     | 1.5                | 0.0    |
| Seaweed                         | 0.9     | 1.2                | 0.3    | Herbal infusion                                   | 0.0     | 0.0                | 0.0    |
| Zucchini, pumpkin,              | 0.1     | 0.2                | 0.0    | Coca-cola, pepsi                                  | 1.6     | 2.9                | 0.5    |

|                                        |     |     |     |                            |       |      |       |
|----------------------------------------|-----|-----|-----|----------------------------|-------|------|-------|
| Green, red, yellow, orange pepper      | 3.1 | 2.1 | 3.0 | Fanta, sprite , etc.       | 0.1   | 0.3  | 0.0   |
| Green beans                            | 0.9 | 1.3 | 0.0 | Wine (a glass)             | 0.1   | 0.2  | 0.0   |
| Cabbage, red cabbage, brussels sprouts | 1.3 | 1.8 | 0.5 | Beer (half pint)           | 0.1   | 0.2  | 0.0   |
| LEGUMES                                |     |     |     | Other alcoholic drinks     | 0.0   | 0.0  | 0.0   |
| Green peas                             | 1.6 | 1.3 | 2.0 |                            |       |      |       |
| Lentils                                | 0.8 | 0.9 | 0.5 | DAIRY PRODUCTS             |       |      |       |
| White beans                            | 0.6 | 1.0 | 0.3 | Cow milk (a glass)         | 3.3   | 4.8  | 1.5   |
| Red beans                              | 0.3 | 0.4 | 0.0 | Cheese (a portion)         | 3.7   | 2.8  | 3.0   |
| NUTS                                   |     |     |     | Creamy cheese              | 0.20  | 0.00 |       |
| Almonds                                | 2.5 | 3.0 | 3.0 | Sour cream                 | 0.6   | 1.0  | 0.0   |
| Walnuts                                | 2.1 | 2.6 | 1.8 | Yogurt, kefir              | 3.0   | 2.7  | 3.0   |
| Sunflower seeds                        | 0.2 | 0.4 | 0.0 | EGG (1-2)                  | 2.50  | 3.00 | 2.58  |
| Sesame seeds                           | 0.1 | 0.2 | 0.0 | SPICES                     |       |      |       |
| Hazelnuts                              | 0.9 | 2.3 | 0.3 | Salt                       | 6.2   | 7.9  | 2.0   |
| Pistachios, peanuts                    | 0.9 | 1.8 | 0.3 | Black pepper               | 4.8   | 5.4  | 3.0   |
| Chia seeds                             | 1.2 | 2.4 | 0.0 | Paprika                    | 2.4   | 4.5  | 0.3   |
| FRUITS                                 |     |     |     | Turmeric, curry powder     | 0.9   | 2.3  | 0.0   |
| Berries                                | 2.9 | 4.3 | 3.0 | Cinnamon                   | 0.9   | 2.3  | 0.0   |
| Melon, watermelon                      | 1.5 | 1.4 | 3.0 | Curcumin                   | 0.7   | 0.9  | 0.5   |
| Mango, pineapple, papaya               | 2.0 | 1.3 | 3.0 | Nutmeg                     | 0.2   | 0.4  | 0.0   |
| grapes                                 | 2.2 | 2.2 | 3.0 | Cilantro, parsley          | 0.1   | 0.2  | 0.0   |
| orange, tangerines                     | 2.4 | 2.4 | 2.0 | Clove                      | 2.2   | 1.8  | 2.0   |
| Apple, pear                            | 2.3 | 2.2 | 3.0 | COOKING                    |       |      |       |
| Peach, nectarine, apricot              | 2.4 | 1.7 | 3.0 | Steam or boiling           | 2.8   | 2.2  | 3.0   |
| Avocado                                | 4.9 | 4.0 | 3.0 | Fried (less than 5 minuts) | 0.8   | 1.3  | 0.0   |
| Banana                                 | 0.9 | 1.2 | 0.5 | Fried (more than 5 minuts) | 1.9   | 2.4  | 3.0   |
| Lime, lemon                            | 1.4 | 2.3 | 0.8 | Baked                      | 1.7   | 1.3  | 1.0   |
| Prunes, raisins                        | 0.5 | 1.0 | 0.3 | Fast food                  | 1.5   | 2.1  | 0.5   |
| Fruit juice (home-made)                | 0.3 | 1.0 | 0.0 | Frozen and canned food     | 1.4   | 1.4  | 0.0   |
| Fruit juice (store bought)             | 0.3 | 1.0 | 0.0 | Pre-cooked food            | 12.2  | 9.5  | 21.0  |
| SAUCES                                 |     |     |     | Home-made food             | 20.00 | 3.00 | 17.58 |
| Ketchup                                | 0.4 | 0.3 | 0.5 | OTHER HABITS               |       |      |       |
| Tomato sauce                           | 1.1 | 1.1 | 0.5 | Light exercise             | 5.0   | 2.8  | 5.5   |
| Barbeque sauce                         | 0.9 | 0.9 | 0.5 | Moderate-intense exercise  | 1.2   | 1.9  | 0.3   |
| Cheese dip                             | 0.3 | 0.4 | 0.0 | Tobacco                    | 0.0   | 0.0  | 0.0   |
| Mayonnaise                             | 0.2 | 0.3 | 0.0 | Marijuana                  | 0.0   | 0.0  | 0.0   |
| Other sauces                           | 0.3 | 0.4 | 0.3 | Other drugs                | 0.0   | 0.0  | 0.0   |

**Additional file 3. Knowledge and accessibility to specific ingredients.**

|                                                     |
|-----------------------------------------------------|
| <b>1-</b> Do you know it?                           |
| <b>2-</b> Do you consume it?                        |
| <b>3-</b> Do you know how to cook it?               |
| <b>4-</b> Do you have time to cook it?              |
| <b>5-</b> Do you like the flavour?                  |
| <b>6-</b> Are you open to increase its consumption? |
| <b>7-</b> Do you know where to buy it?              |
| <b>8-</b> Can you buy it near your home?            |
| <b>9-</b> Do you know the price?                    |
| <b>10-</b> Can you afford it?                       |

| Product       | 1     | 2     | 3    | 4     | 5     | 6     | 7     | 8     | 9     | 10    | Accessibility * | Knowledge** |
|---------------|-------|-------|------|-------|-------|-------|-------|-------|-------|-------|-----------------|-------------|
| Apple         | 100.0 | 100.0 | 90.9 | 100.0 | 100.0 | 100.0 | 100.0 | 100.0 | 81.8  | 100.0 | 95.5            | 97.7        |
| Celery        | 100.0 | 54.5  | 72.7 | 90.9  | 90.9  | 90.9  | 100.0 | 100.0 | 72.7  | 54.5  | 81.8            | 79.5        |
| Ginger        | 100.0 | 63.6  | 72.7 | 100.0 | 63.6  | 90.9  | 100.0 | 100.0 | 54.5  | 63.6  | 79.5            | 84.1        |
| Carrot        | 100.0 | 90.9  | 100  | 100.0 | 100.0 | 100.0 | 100.0 | 100.0 | 81.8  | 90.9  | 93.2            | 97.7        |
| Rye           | 36.4  | 27.3  | 18.2 | 54.5  | 27.3  | 63.6  | 54.5  | 45.5  | 9.1   | 27.3  | 34.1            | 34.1        |
| Wheat bread   | 90.9  | 72.7  | 90.9 | 90.9  | 81.8  | 90.9  | 90.9  | 90.9  | 81.8  | 72.7  | 84.1            | 86.4        |
| Avocado       | 100.0 | 81.8  | 90.9 | 90.9  | 90.9  | 100.0 | 100.0 | 100.0 | 100.0 | 81.8  | 95.5            | 90.9        |
| Green tea     | 90.9  | 45.5  | 90.9 | 90.9  | 54.5  | 81.8  | 72.7  | 72.7  | 72.7  | 45.5  | 65.9            | 79.5        |
| Sesame seeds  | 72.7  | 27.3  | 36.4 | 90.9  | 54.5  | 100.0 | 81.8  | 81.8  | 63.6  | 27.3  | 63.6            | 56.8        |
| Tahini        | 45.5  | 18.2  | 27.3 | 54.5  | 27.3  | 63.6  | 45.5  | 45.5  | 27.3  | 18.2  | 34.1            | 36.4        |
| Yogurt        | 100.0 | 72.7  | 90.9 | 90.9  | 81.8  | 81.8  | 90.9  | 90.9  | 90.9  | 72.7  | 86.4            | 88.6        |
| Kefir         | 27.3  | 9.1   | 18.2 | 45.5  | 0.0   | 54.5  | 36.4  | 36.4  | 18.2  | 9.1   | 25.0            | 25.0        |
| Mango         | 100.0 | 81.8  | 72.7 | 90.9  | 81.8  | 90.9  | 90.9  | 90.9  | 90.9  | 81.8  | 88.6            | 86.4        |
| Pinneapple    | 100.0 | 90.9  | 72.7 | 100.0 | 100.0 | 100.0 | 100.0 | 100.0 | 100.0 | 90.9  | 97.7            | 90.9        |
| Aurugula      | 54.5  | 27.3  | 27.3 | 72.7  | 27.3  | 63.6  | 54.5  | 54.5  | 27.3  | 27.3  | 40.9            | 45.5        |
| Chicken       | 90.9  | 90.9  | 90.9 | 90.9  | 90.9  | 90.9  | 100.0 | 100.0 | 90.9  | 90.9  | 95.5            | 90.9        |
| Brown rice    | 100.0 | 54.5  | 81.8 | 90.9  | 100.0 | 100.0 | 100.0 | 100.0 | 90.9  | 54.5  | 86.4            | 81.8        |
| Mushrooms     | 100.0 | 63.6  | 81.8 | 100.0 | 90.9  | 90.9  | 100.0 | 100.0 | 100.0 | 63.6  | 90.9            | 86.4        |
| Walnuts       | 100.0 | 81.8  | 90.9 | 100.0 | 100.0 | 90.9  | 100.0 | 90.9  | 81.8  | 81.8  | 88.6            | 93.2        |
| Curry powder  | 72.7  | 36.4  | 54.5 | 81.8  | 54.5  | 81.8  | 90.9  | 81.8  | 54.5  | 36.4  | 65.9            | 61.4        |
| Turmeric      | 63.6  | 18.2  | 36.4 | 63.6  | 36.4  | 63.6  | 54.5  | 54.5  | 27.3  | 18.2  | 38.6            | 45.5        |
| Black pepper  | 100.0 | 90.9  | 90.9 | 100.0 | 90.9  | 81.8  | 100.0 | 100.0 | 90.9  | 90.9  | 95.5            | 95.5        |
| Quinoa        | 72.7  | 18.2  | 27.3 | 63.6  | 45.5  | 72.7  | 63.6  | 63.6  | 27.3  | 18.2  | 43.2            | 45.5        |
| Miso          | 36.4  | 9.1   | 27.3 | 54.5  | 36.4  | 72.7  | 36.4  | 36.4  | 18.2  | 9.1   | 25.0            | 31.8        |
| Tofu          | 54.5  | 9.1   | 18.2 | 45.5  | 18.2  | 54.5  | 54.5  | 54.5  | 27.3  | 9.1   | 36.4            | 31.8        |
| Flaxseed oil  | 36.4  | 18.2  | 18.2 | 45.5  | 18.2  | 63.6  | 45.5  | 45.5  | 27.3  | 18.2  | 34.1            | 29.5        |
| Pasta         | 90.9  | 72.7  | 90.9 | 90.9  | 90.9  | 81.8  | 90.9  | 90.9  | 90.9  | 72.7  | 86.4            | 86.4        |
| Honey         | 81.8  | 63.6  | 63.6 | 72.7  | 81.8  | 72.7  | 72.7  | 72.7  | 81.8  | 63.6  | 72.7            | 70.5        |
| Cucumber      | 90.9  | 72.7  | 63.6 | 81.8  | 90.9  | 72.7  | 90.9  | 90.9  | 90.9  | 72.7  | 86.4            | 77.3        |
| Chia seeds    | 81.8  | 36.4  | 72.7 | 81.8  | 63.6  | 81.8  | 81.8  | 81.8  | 72.7  | 36.4  | 68.2            | 68.2        |
| Orange        | 90.9  | 72.7  | 72.7 | 81.8  | 81.8  | 81.8  | 90.9  | 90.9  | 90.9  | 72.7  | 86.4            | 79.5        |
| Parsley       | 81.8  | 54.5  | 72.7 | 81.8  | 63.6  | 54.5  | 81.8  | 81.8  | 72.7  | 54.5  | 72.7            | 72.7        |
| Strawberries  | 90.9  | 72.7  | 81.8 | 90.9  | 90.9  | 81.8  | 90.9  | 90.9  | 90.9  | 72.7  | 86.4            | 84.1        |
| Mint          | 81.8  | 36.4  | 54.5 | 72.7  | 54.5  | 63.6  | 81.8  | 81.8  | 63.6  | 36.4  | 65.9            | 61.4        |
| Lemon/lime    | 90.9  | 81.8  | 81.8 | 90.9  | 90.9  | 81.8  | 90.9  | 90.9  | 81.8  | 81.8  | 86.4            | 86.4        |
| Lettuce       | 90.9  | 72.7  | 72.7 | 90.9  | 81.8  | 72.7  | 90.9  | 90.9  | 90.9  | 72.7  | 86.4            | 81.8        |
| Kiwi          | 90.9  | 36.4  | 63.6 | 81.8  | 63.6  | 72.7  | 90.9  | 90.9  | 63.6  | 36.4  | 70.5            | 68.2        |
| Coconut water | 90.9  | 27.3  | 54.5 | 81.8  | 81.8  | 81.8  | 81.8  | 81.8  | 72.7  | 27.3  | 65.9            | 63.6        |
| Radish        | 90.9  | 54.5  | 72.7 | 90.9  | 72.7  | 81.8  | 90.9  | 90.9  | 81.8  | 54.5  | 79.5            | 77.3        |
| Omelette      | 36.4  | 27.3  | 18.2 | 45.5  | 27.3  | 36.4  | 27.3  | 27.3  | 27.3  | 27.3  | 27.3            | 31.8        |
| Apple vinager | 63.6  | 36.4  | 36.4 | 63.6  | 36.4  | 63.6  | 54.5  | 54.5  | 36.4  | 36.4  | 45.5            | 50.0        |
| Sweet potato  | 63.6  | 27.3  | 45.5 | 54.5  | 36.4  | 63.6  | 54.5  | 54.5  | 45.5  | 27.3  | 45.5            | 47.7        |

This table shows the average per all patients: if the response was negative, we assigned 0. If the response was positive, we assigned 100, and if it was doubtful, we assigned 50.

\*Accessibility has been calculated as the average of the following questions: Do you know where to buy it? Can you buy it near your home? Do you know the price? And can you afford it?

\*\*Knowledge was calculated as the average of the following questions: Do you know it? Do you consume it? and do you know how to cook it?

**Additional file 4.** Patients feedback on the preliminary version of the anti-inflammatory diet

- 
1. Do you think you can adapt to the proposed feeding schedules? What would you change?
  2. Do you think the amount of food and the schedule described will satisfy you?
  3. Do you have enough time to prepare juices and breakfast in the morning?
  4. Do you think you can correctly prepare the suggested meals for breakfast, lunch and snack?
  5. How do you cook?
- 

|                   | 1         | 2            | 3   | 4         | 5                     | Comments                                                 |
|-------------------|-----------|--------------|-----|-----------|-----------------------|----------------------------------------------------------|
| <b>Hispanic1</b>  | Yes       | Yes          | Yes | Yes       | No answer             | She would like cow's milk                                |
| <b>Hispanic2</b>  | No answer | Yes          | Yes | Yes       | Steam                 | His wife cooks his meals                                 |
| <b>Hispanic3</b>  | Yes       | Yes          | Yes | No        | Steam                 | She does not like most of the suggested ingredients      |
| <b>Hispanic4</b>  | Yes       | Yes          | Yes | Yes       | Steam, grilled, baked | No comment                                               |
| <b>Hispanic5</b>  | Yes       | Yes          | Yes | Yes       | No answer             | No comment                                               |
| <b>Hispanic6</b>  | No answer | No           | Yes | No answer | No answer             | She usually does not have dinner                         |
| <b>Hispanic7</b>  | Yes       | Yes          | Yes | Yes       | Mostly frying         | No comment                                               |
| <b>Hispanic8</b>  | Yes       | Yes          | Yes | Yes       | No answer             | She asks for recipes                                     |
| <b>Hispanic9</b>  | Yes       | Yes          | Yes | Yes       | No answer             | She asks for recipes                                     |
| <b>Caucasian1</b> | Yes       | More or less | No  | No        | No answer             | She is open to try this diet                             |
| <b>Caucasian2</b> | Yes       | No           | Yes | Yes       | Boiled, baked         | She would like coffee in the diet. Maybe not enough food |
| <b>Caucasian3</b> | Yes       | Yes          | Yes | Yes       | Steam, grilled        | She is open to try this diet                             |
| <b>Caucasian4</b> | No answer | Yes          | Yes | No        | No answer             | She does not like peas and mushrooms                     |
| <b>Caucasian5</b> | Yes       | Yes          | Yes | Yes       | No answer             | She is skeptical about the diet                          |
| <b>Caucasian6</b> | Yes       | Yes          | Yes | Yes       | No answer             | No comment                                               |

**Additional file 5.** This text shows our ITIS-diet instructions

## **INSTRUCTIONS FOR LUNCH/DINNER:**

As long as you follow the general guidelines described below, you can adapt lunch and dinner dishes to your own tastes.

### **GENERAL STRUCTURE**

#### **LUNCH OPTIONS:**

1. Salad (generous plate). Add flaxseed oil, apple vinegar and salt. Apple vinegar is recommended although a suitable alternative such as balsamic or wine vinegar may be used if necessary. Do not use commercial sauces.

**-Possible ingredients for the salad:**

Green leaf shoots, spinach, arugula, onion/ spring (green) onion, cucumber, radish, celery, carrot, pepper, corn, etc.

You can also add delicious flaxseed or sesame seeds.

2. Grains (whole rice, quinoa, whole-wheat pasta, with vegetables and/or mushrooms (generous plate). Season with turmeric and black pepper. Do not mix grains with protein (meat, fish, eggs, tofu).

**-Grains or pseudo-cereals:**

Brown rice, whole wheat pasta, quinoa, millet, couscous. Quinoa is a beneficial pseudo-cereal that contains both proteins and carbohydrates; we encourage you to try it.

**-Vegetables:**

Green beans, broccoli, chard, carrots, celery, leeks, garlic, artichokes, onions, corn, pumpkin, zucchini, radish, etc.

Remember you cannot eat tomato, potato, and eggplant.

3. Legumes with vegetables. The legumes need to be boiled for 30 minutes to 1 hour before eating them. Also, you can buy them already cooked in the supermarket. Season with turmeric and black pepper. Do not mix legumes with other sources of protein (meat, fish, eggs, tofu).

**-Legumes:**

White beans, black beans, garbanzo beans, lentils, peas, frijoles, etc.

#### **DINNER OPTIONS:**

1. Vegetable cream/soup (do not add dairy products) and a plate with protein.

2. Soup and a plate of protein.

3. Salad and a plate of protein.

- Season the plates with turmeric and black pepper or flaxseed oil.

**-Proteins:**

Eggs in omelet or cooked other ways (except fried eggs), chicken, turkey, White or fatty fish, tofu.

**-Vegetables:**

Green beans, broccoli, chard, carrots, celery, leeks, garlic, artichokes, onions, corn, pumpkin, zucchini, radish, etc.

Remember you cannot eat tomato, potato, and eggplant.



Need help choosing options?

You may distribute the lunch and dinner options as you wish throughout the week, as long as you have each option at least twice a week.

Eat fish two to three times a week; incorporate fatty fish at least 1-2 times a week (tuna/salmon/anchovies/sardines).

Eat 2-4 eggs and eat red meat only once a week.

**TYPES OF COOKING:** steam cooking, short boiling (vegetables), baking, grilling

If you need to use oil or butter to cook, it is better to use olive oil and fry less than 5 minutes.

### **FORBIDDEN FOODS/DRINKS**

1. Tomato, eggplant, and potato. You can use sweet potatoes or turnips instead of potatoes for creamy texture.
2. Milk, cheese, and other dairy products (except yogurt). You can use oat/almond/rice milk instead and use an avocado spread instead of cheese spreads.
3. Reduce consumption of red meat to a minimum (try to eat white meat instead).
4. Reduce consumption of coffee (try to drink green tea instead).
5. Do not consume sauces (you can use homemade preparations instead).
6. Do not consume sugar or sugary products. You can sweeten foods with a small spoonful of honey or stevia.
7. Do not consume sodas. You can make a rich lemonade at home and sweeten it with honey or stevia.
8. Do not consume butter, margarine, or industrial pastries.

### **OTHER GUIDELINES**

1. Avoid eating pre-cooked or out-of-home meals. If you eat outside your home, follow the guidelines in this section.
2. Eat vegetables every day: such as a vegetable cream, boiled vegetables (short time boiling), or raw in a salad. Examples of vegetables you can eat: green beans, broccoli, chard, carrots, celery, leeks, artichokes, onions, spring onion, corn, pumpkin, radishes, garlic, etc.
3. For salads: try sprouts, arugula, lamb's lettuce, mixtures of shoots.
4. Include black pepper and turmeric. Use both seasonings at the same time, at least once a day.
5. Season with apple vinegar or flaxseed oil. Use at least once a day.
6. Reduce salt intake.
7. You may eat rye bread (German bread that we provide) or corn tortillas. Avoid sandwich bread (processed white bread) and wheat bread.
8. Eat grilled white meat protein (chicken, turkey) (2/3 times a week) or white fish (cod, mahi-mahi). You can also eat up to 4 eggs a week. Or tofu. Try to avoid red meat.
9. Consume fatty fish twice a week (tuna, sardines, salmon, and anchovies).
10. Eat whole grains or pseudo-cereals twice or three times a week.
11. Eat legumes two or three times a week.
12. Start your dinner with a miso soup twice a week.
13. Consume avocado, sesame seeds or tahini every day.

## SUMMARY

| FOODS TO AVOID                                                                                                   | FOODS TO EAT                                                                                                                            |
|------------------------------------------------------------------------------------------------------------------|-----------------------------------------------------------------------------------------------------------------------------------------|
| - Refined grains (white rice, refined flour derived products, industrial bread)                                  | - Whole grains (whole rice, spelled pasta, quinoa, millet, rye bread)                                                                   |
| - Eggplant, tomato, potatoes.                                                                                    | - Green leafy vegetables and fruits (green beans, lettuce, artichokes, broccoli, celery, zucchini, apple, mango, papaya, and pineapple) |
| - Saturated lipids (butter, mayonnaise, ketchup and other commercial sauces, red meat, dry meat, salami, cheese) | - Omega 3 lipids (sesame seeds and tahini, avocado, olive and flaxseed oil, white meat, walnuts)                                        |
| - All types of sugars and other additives to sweeten                                                             | - Honey or stevia                                                                                                                       |
| - Dairy products (cow milk, cheese)                                                                              | - Avocado and soy/rice/almond milk                                                                                                      |
| - Coffee                                                                                                         | - Green or red tea                                                                                                                      |
| -(Keep to a minimum) Gluten products (wheat, all type of wheat cereals, wheat tortillas, flour derived products) | - Food without gluten or with better quality of gluten (spelt, rye). Corn tortillas, spelt pasta, rye bread                             |
| - Sodas and commercial juices                                                                                    | - Water and fruit juices made at home                                                                                                   |

To assist you in following this diet, we will give you some of the key ingredients. You should receive the following:

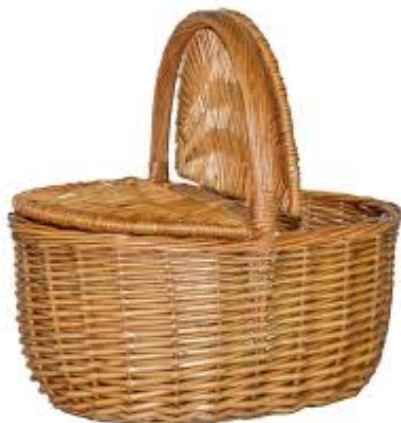

TURMERIC  
BLACK PEPPER  
POWDER GINGER  
FLAXSEED OIL (KEEP REFRIGERATED)  
APPLE VINAGER  
TAHINI  
SESAME SEEDS  
MISO (KEEP REFRIGERATED)  
CHIA SEEDS  
FLAXSEED SEEDS  
GERMAN BREAD (rye bread)  
OATMEAL  
ALMOND MILK  
OLIVE OIL
